# Supplementary material for: Phytochemical Study of the Ecuadorian Species Lepechinia mutica (Benth.) Epling and High Antifungal Activity of Carnosol against Pyricularia oryzae
Source: PubMed Central journal article supplement (PMC6027405; doi:10.3390/ph11020033), 2018-04-19
Supplement: pharmaceuticals-11-00033-s001.pdf [file pharmaceuticals-11-00033-s001.pdf]

## Spectroscopic data.

### Carnosol (1)

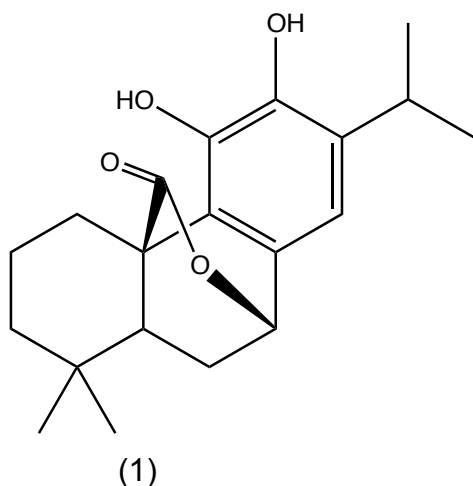

Colorless crystals, mp: 233-237°C,  $[\alpha]_D^{20} = -51,9$  ( $c$  0.05 in  $\text{CHCl}_3$ ). The molecular formula  $\text{C}_{20}\text{H}_{26}\text{O}_4$  was established from the MS ( $\text{EI}^+$ )  $\text{M}^+$  at  $m/z$  331.42  $[\text{M}+\text{H}]^+$ .  $^1\text{H-NMR}$  ( $\text{CD}_3\text{OD}$ , 200 MHz)  $\delta$  6.69 (H, s, H-14), 5.44 (1H, dd,  $J = 3.8, 1.4$  Hz, H-7), 3.28 (1H, sept,  $J = 6.8$ , H-15), 2.65 (1H, dd,  $J = 14, 1.6$  Hz, H-1 $\alpha$ ), 2.49 (1H, ddd,  $J = 14, 4.6$  Hz, H-1 $\beta$ ), 1.91 (1H, ddd, H-6 $\alpha$ ), 1.6 (1H, m, H-6 $\beta$ ), 1.56 (1H, dd,  $J = 10.6, 5.4$  Hz, H-5), 1.50 (1H, m, H-2 $\beta$ ), 1.42 (1H, dd,  $J = 13, 1.4$  Hz, H-3 $\alpha$ ), 1.21 (1H, ddd,  $J = 13.4, 3.2$  Hz, H-3 $\beta$ ), 1.10 (2 $\times$ 3H, d,  $J = 6.8$ , H<sub>3</sub>-17, H<sub>3</sub>-16), 0.87 (3H, s, H-18), 0.87 (3H, s, H-19).

Viridiflorol (2)

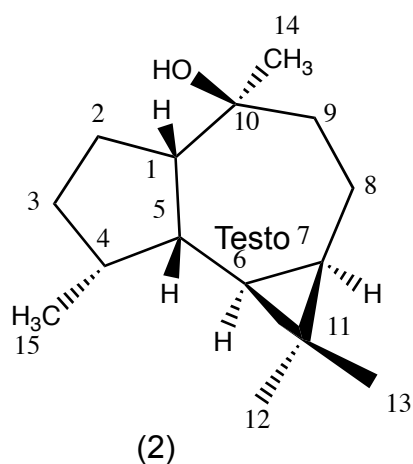

Colorless oil,  $[\alpha]_D^{20} = +11.70$  ( $c$  0.04 in  $\text{CH}_2\text{Cl}_2$ ). The molecular formula  $\text{C}_{15}\text{H}_{26}\text{O}$  was established from the MS ( $\text{EI}^+$ )  $\text{M}^+$  at  $m/z$  222.36.  $^1\text{H-NMR}$  ( $\text{CDCl}_3$ , 300 MHz)  $\delta$  0.13 (1H, t,  $J = 9,2$  Hz), 0.64 (1H, ddd,  $J = 12, 9,6$  Hz), 0.93 (3H, d,  $J = 6,6$  Hz), 1.01 (3H, s), 1.04 (3H, s), 1.18 (3H, s), 1.22-1.98 (12H, m).  $^{13}\text{C-NMR}$  ( $\text{CDCl}_3$ , 75 MHz)  $\delta$  74.6 (C-10), 58.2 (C-1), 39.7 (C-5), 38.5 (C-4), 37.8 (C-9), 32.1 (C-14), 29.1 (C-3), 28.7 (C-12), 28.6 (C-7), 25.8 (C-2), 22.3 (C-6), 18.8 (C-8), 18.4 (C-11), 16.3 (C-15), 16.1 (C-13).

Ursolic acid (3)

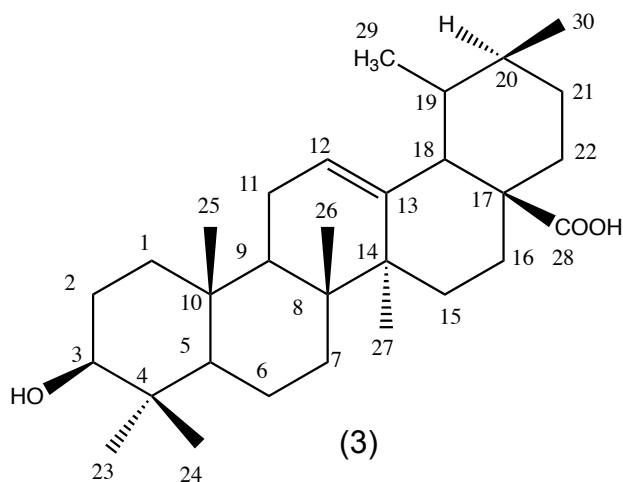

Whitish powder; mp: 210-221°C,  $[\alpha]_{\text{D}}^{20} = +52.84$  ( $c$  0.022 in MeOH)]. The molecular formula  $\text{C}_{30}\text{H}_{48}\text{O}_3$  was established from the MS ( $\text{EI}^+$ )  $\text{M}^+$  at  $m/z$  457.79  $[\text{M}+\text{H}]^+$ , 479.68  $[\text{M}+\text{Na}]^+$ , 935.69  $[2\text{M}+\text{Na}]^+$ .  $^1\text{H-NMR}$  ( $\text{CD}_3\text{COCD}_3$ , 300 MHz)  $\delta$  5.25 (H, t,  $J = 3.4$  Hz, H-12), 2.91 (H, m, H-3), 2.09 (H, d,  $J = 11.6$  Hz, H-18), 1.06 (3H, s, Me-27), 0.95 (3H, s, Me-23), 0.92 (3H, s, Me-26) 0.89 (3H, d,  $J = 6$  Hz, H-30), 0.84 (3H, d,  $J = 6$  Hz, H-29), 0.81 (3H, s, Me-24), 0.79 (3H, s, Me-25);  $^{13}\text{C-NMR}$  ( $\text{CD}_3\text{COCD}_3$ , 75 MHz)  $\delta$  179.3 (C-28), 139.7 (C-13), 123.4 (C-12), 78.8 (C-3), 56.6 (C-5), 54.2 (C-18), 48.9 (C-9), 48.8 (C-17), 42.6 (C-14), 39.8 (C-8), 39.7 (C-4), 38.2 (C-19), 38.1 (C-20), 37.9 (C-1), 37.0 (C-10), 36.8 (C-22), 31.6 (C-7), 29.6 (C-21), 29.1 (C-15), 28.0 (C-23), 27.4 (C-2), 24.3 (C-16), 23.7 (C-27), 23.3 (C-11), 21.5 (C-30), 18.4 (C-6), 17.5 (C-29), 17.4 (C-26), 16.7 (C-24), 16.2 (C-25).

Oleanolic acid (4)

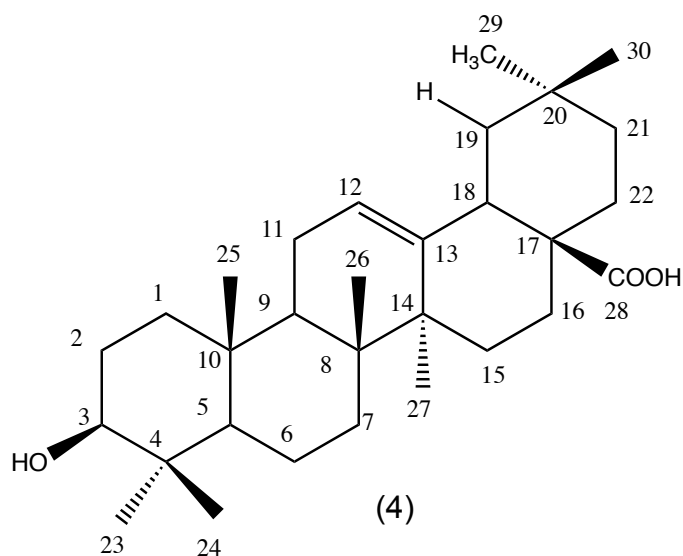

Whitish powder; mp:  $>300^{\circ}\text{C}$ ,  $[\alpha]_{\text{D}}^{20} = +56.53$  ( $c$  0.032 in MeOH)]. The molecular formula  $\text{C}_{30}\text{H}_{48}\text{O}_3$  was established from the MS ( $\text{EI}^+$ )  $\text{M}^+$  at  $m/z$  457.92  $[\text{M}+\text{H}]^+$ , 479.63  $[\text{M}+\text{Na}]^+$ , 935.66  $[2\text{M}+\text{Na}]^+$ .  $^1\text{H-NMR}$  ( $\text{CD}_3\text{OD}$ , 300 MHz)  $\delta$  5.24 (H, t, H-12), 2.98 (H, t, H-3), 2.78 (H, dd,  $J = 6.8, 4$  Hz, H-18), 0.98 (3H, s, Me-27), 0.89 (3H, s, Me-25), 0.86 (2 $\times$ 3H, s, Me-30, 24), 0.83 (3H, s, H-29), 0.79 (3H, s, Me-26), 0.65 (3H, s, Me-23);  $^{13}\text{C-NMR}$  ( $\text{CD}_3\text{OD}$ , 75 MHz)  $\delta$  181.8 (C-28), 145.4 (C-13), 123.8 (C-12), 79.9 (C-3), 56.9 (C-5), 48.9 (C-9), 48.5 (C-19), 43.4 (C-17), 40.9 (C-14), 40.6 (C-18), 40.2 (C-8), 39.9 (C-4), 38.3 (C-1), 37.0 (C-10), 33.8 (C-21), 33.3 (C-29), 32.9 (C-22), 32.5 (C-7), 30.8 (C-20), 28.7 (C-23), 27.6 (C-15), 27.4 (C-2), 26.0 (C-27), 23.8 (C-30), 23.3 (C-16), 23.1 (C-11), 17.9 (C-6), 17.8 (C-26), 16.5 (C-24), 16.1 (C-25).

5-Hydroxy-4',7-dimethoxyflavone (5)

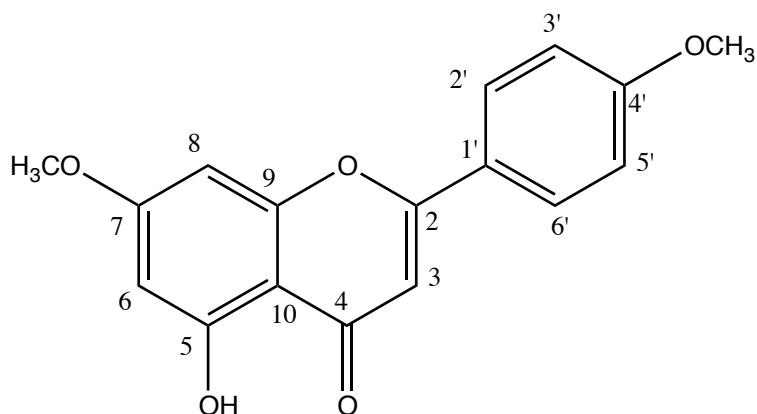

(5)

Yellow powder, mp: 216-218 °C. The molecular formula C<sub>17</sub>H<sub>14</sub>O<sub>5</sub> was established from the MS (EI<sup>+</sup>) M<sup>+</sup> at *m/z* 298.08. <sup>1</sup>H-NMR (CDCl<sub>3</sub>, 400 MHz) δ 12.81 (1H, s, OH-5), 7.84 (2H, d, *J*= 8 Hz, H-2',6'), 7.01 (2H, d, *J*= 8 Hz, H-3',5'), 6.57 (1H, s, H-3), 6.48 (1H, d, *J*= 2.2 Hz, H-6), 6.36 (1H, d, *J*= 4 Hz, H-8), 3.89 (3H, s), 3.88 (3H, s). <sup>13</sup>C-NMR (CDCl<sub>3</sub>, 100 MHz) δ ppm: 182.5 (C-4), 165.6 (C-7), 164.2 (C-2), 162.7 (C-5), 162.3 (C-4'), 157.8 (C-9), 128.2 (C-2',6'), 123.7 (C-1'), 114.6 (C-3',5'), 105.7 (C-10), 104.4 (C-3), 98.2 (C-6), 92.8 (C-8), 55.9 (7-OMe), 55.7 (4'-OMe).

Chrysothol (6)

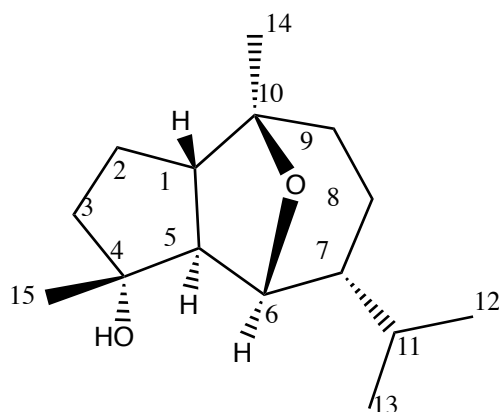

(6)

Colorless oil. The molecular formula  $C_{15}H_{26}O_2$  was established from the MS ( $EI^+$ )  $M^+$  at  $m/z$  238.20.  $^1H$ -NMR ( $CDCl_3$ , 400 MHz)  $\delta$  3.94 (1H, d,  $J = 4.0$  Hz), 2.26 (2H, m), 2.07 (2H, m), 1.68-1.48 (7H, m), 1.34 (2H, m), 1.35 (3H, s), 1.12 (3H, s), 0.87 (2 $\times$ 3H, d,  $J = 7.0$  Hz m).  $^{13}C$ -NMR ( $CDCl_3$ , 100 MHz)  $\delta$  76.1 (C-6), 74.7 (C-4), 74.6 (C-10), 68.2 (C-5), 53.4 (C-1), 48.3 (C-3), 38.7 (C-7), 37.7 (C-9), 32.8 (C-11), 25.9 (C-15), 24.0 (C-2), 22.1 (C-14), 21.2 (C-12), 21.2 (C-13), 20.4 (C-8).

Supplementary material

JR31.1 44/27

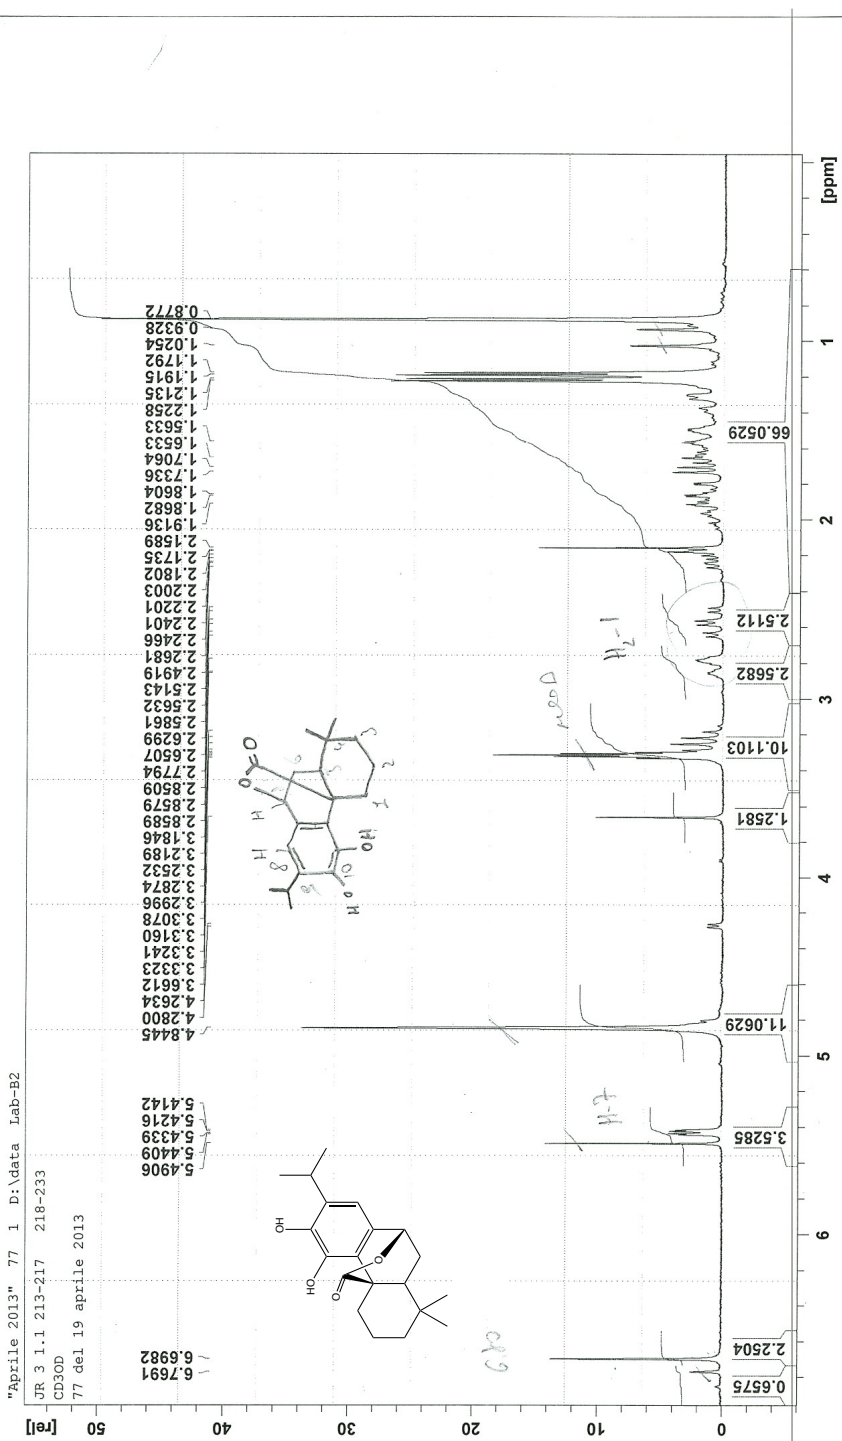

<sup>1</sup>H-NMR (CDCl<sub>3</sub>, 200 MHz) of carnosol.

UR\_3\_1\_1\_19/22 cd3cocd3

JR311 23/25

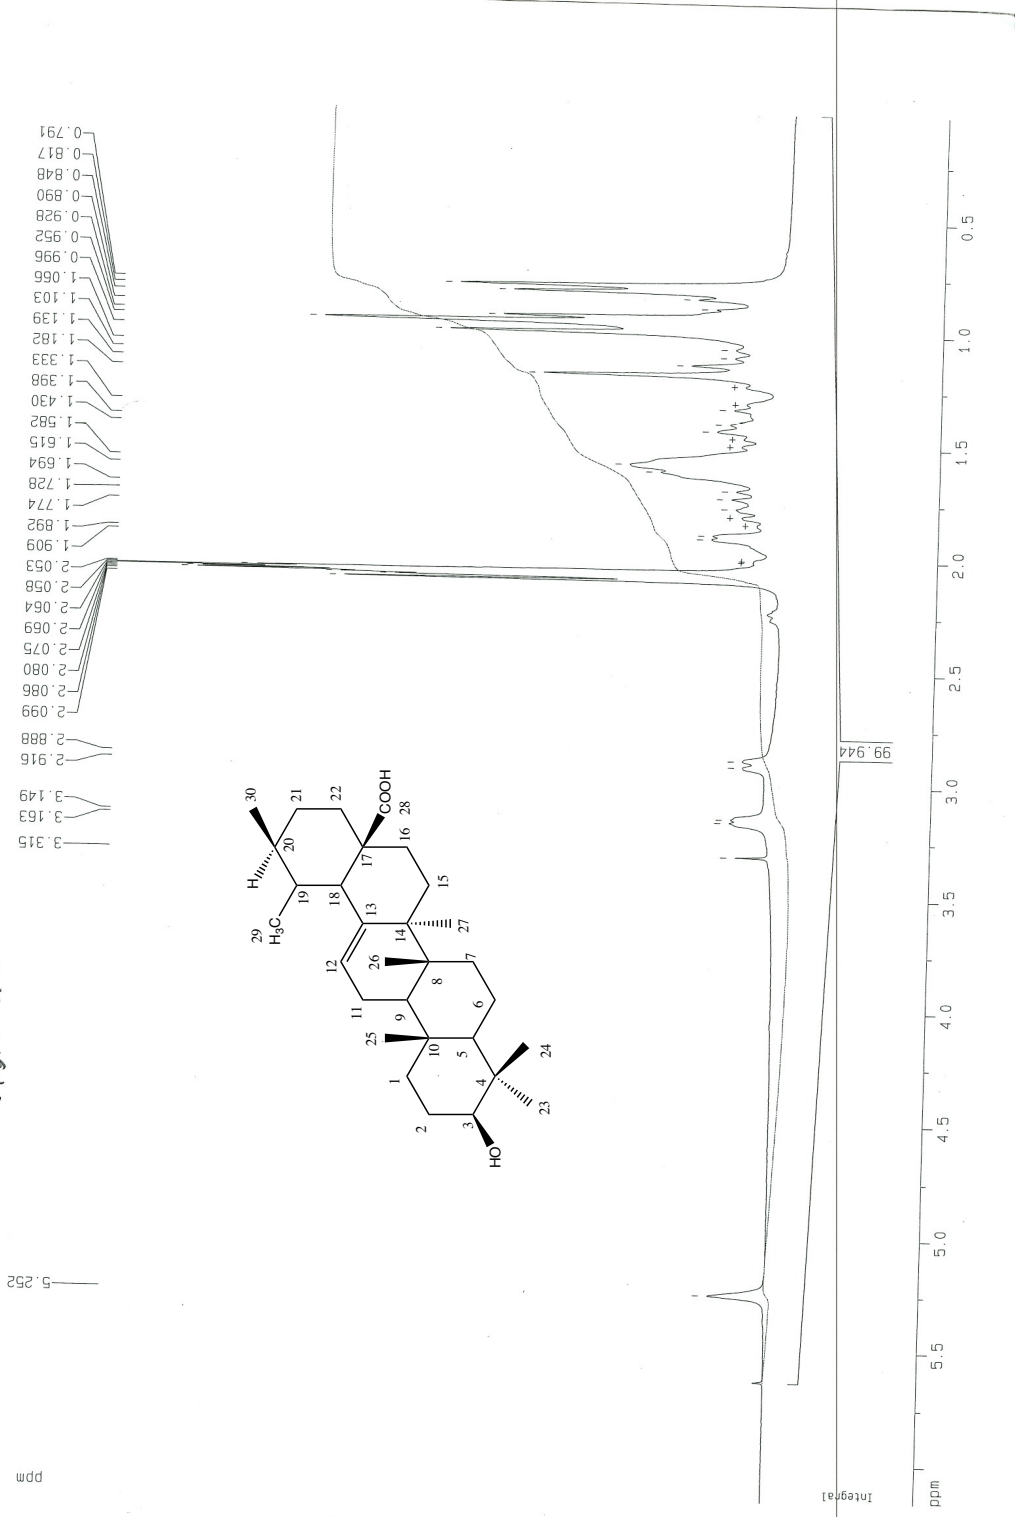

<sup>1</sup>H-NMR of ursolic acid (CD<sub>3</sub>COCD<sub>3</sub>, 300 MHz)



JR\_3\_1\_1.H22 cd3cocc3

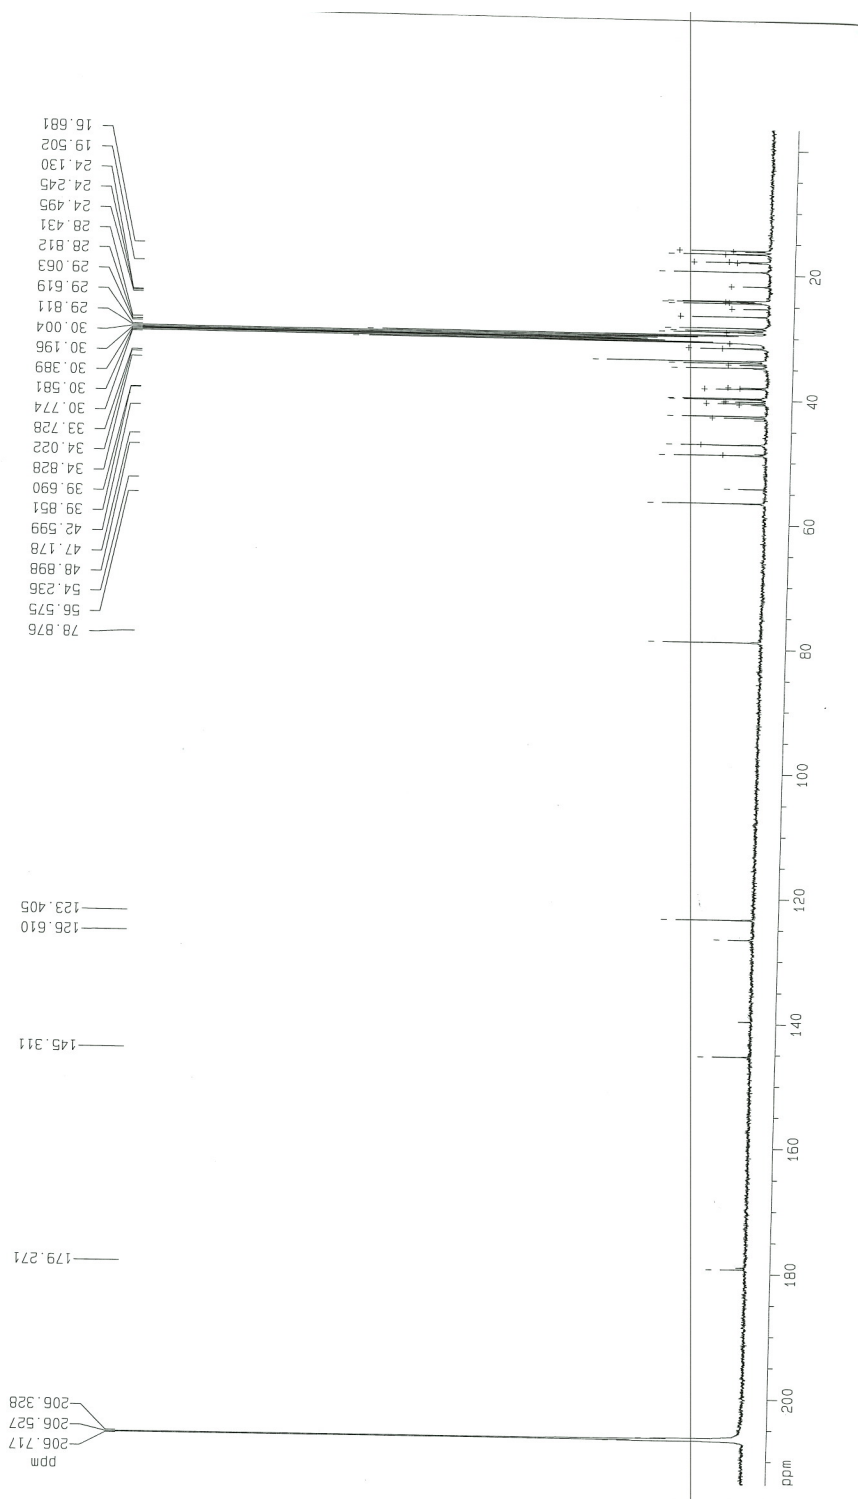

<sup>13</sup>C-NMR of ursolic acid (CD<sub>3</sub>COCD<sub>3</sub>, 75 MHz)

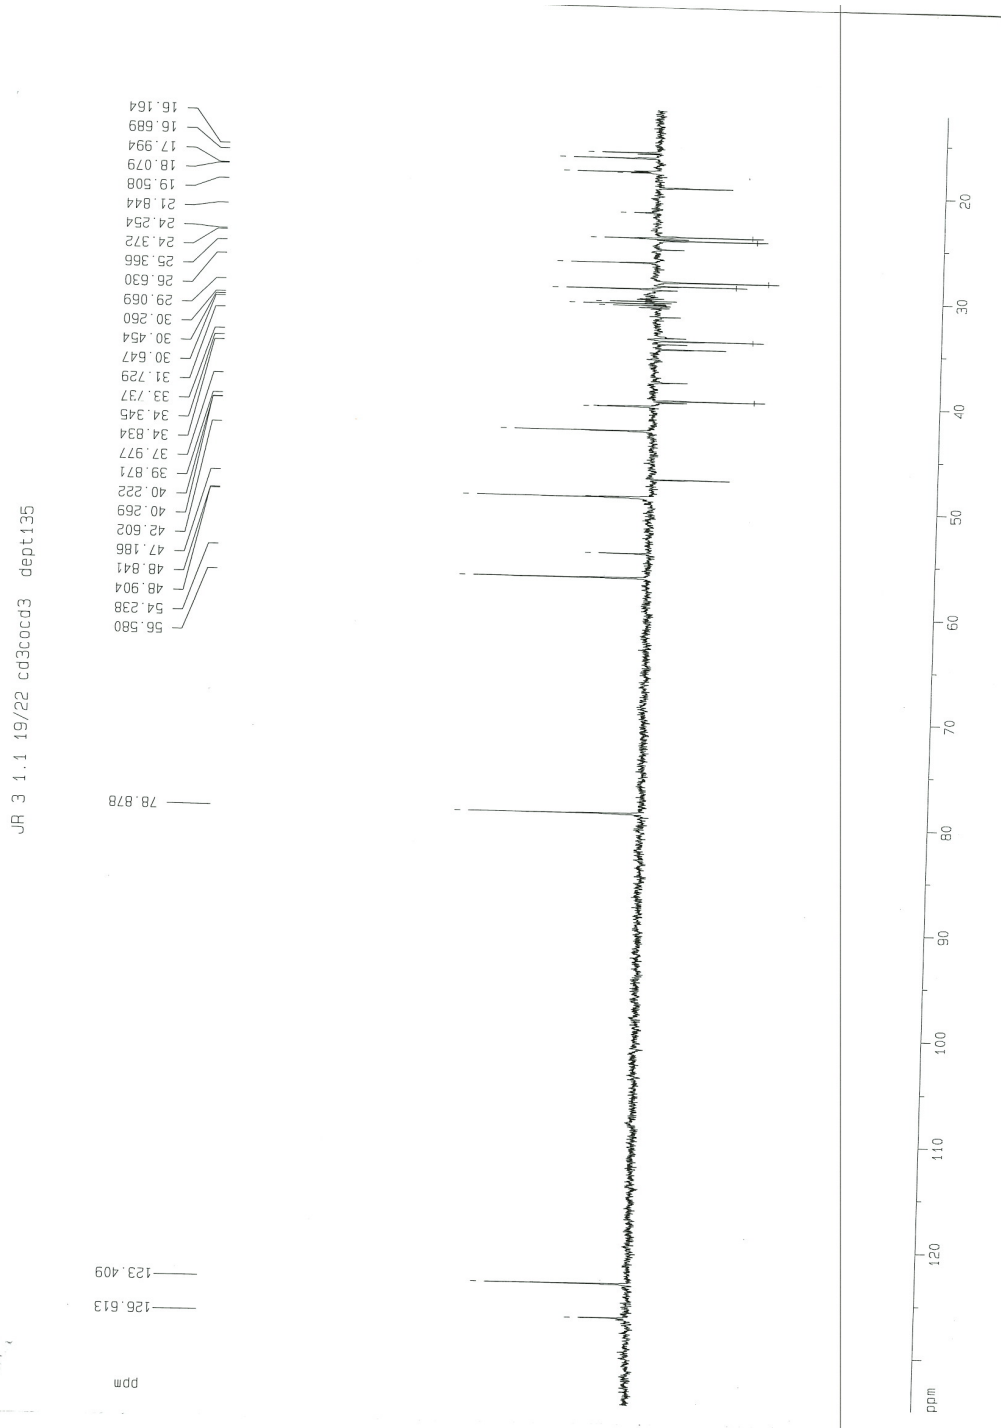

DEPT experiment (300 MHz) of ursolic acid in  $CD_3COCD_3$ .

<sup>1</sup>H-NMR of oleanolic acid (CD<sub>3</sub>OD, 300 MHz)

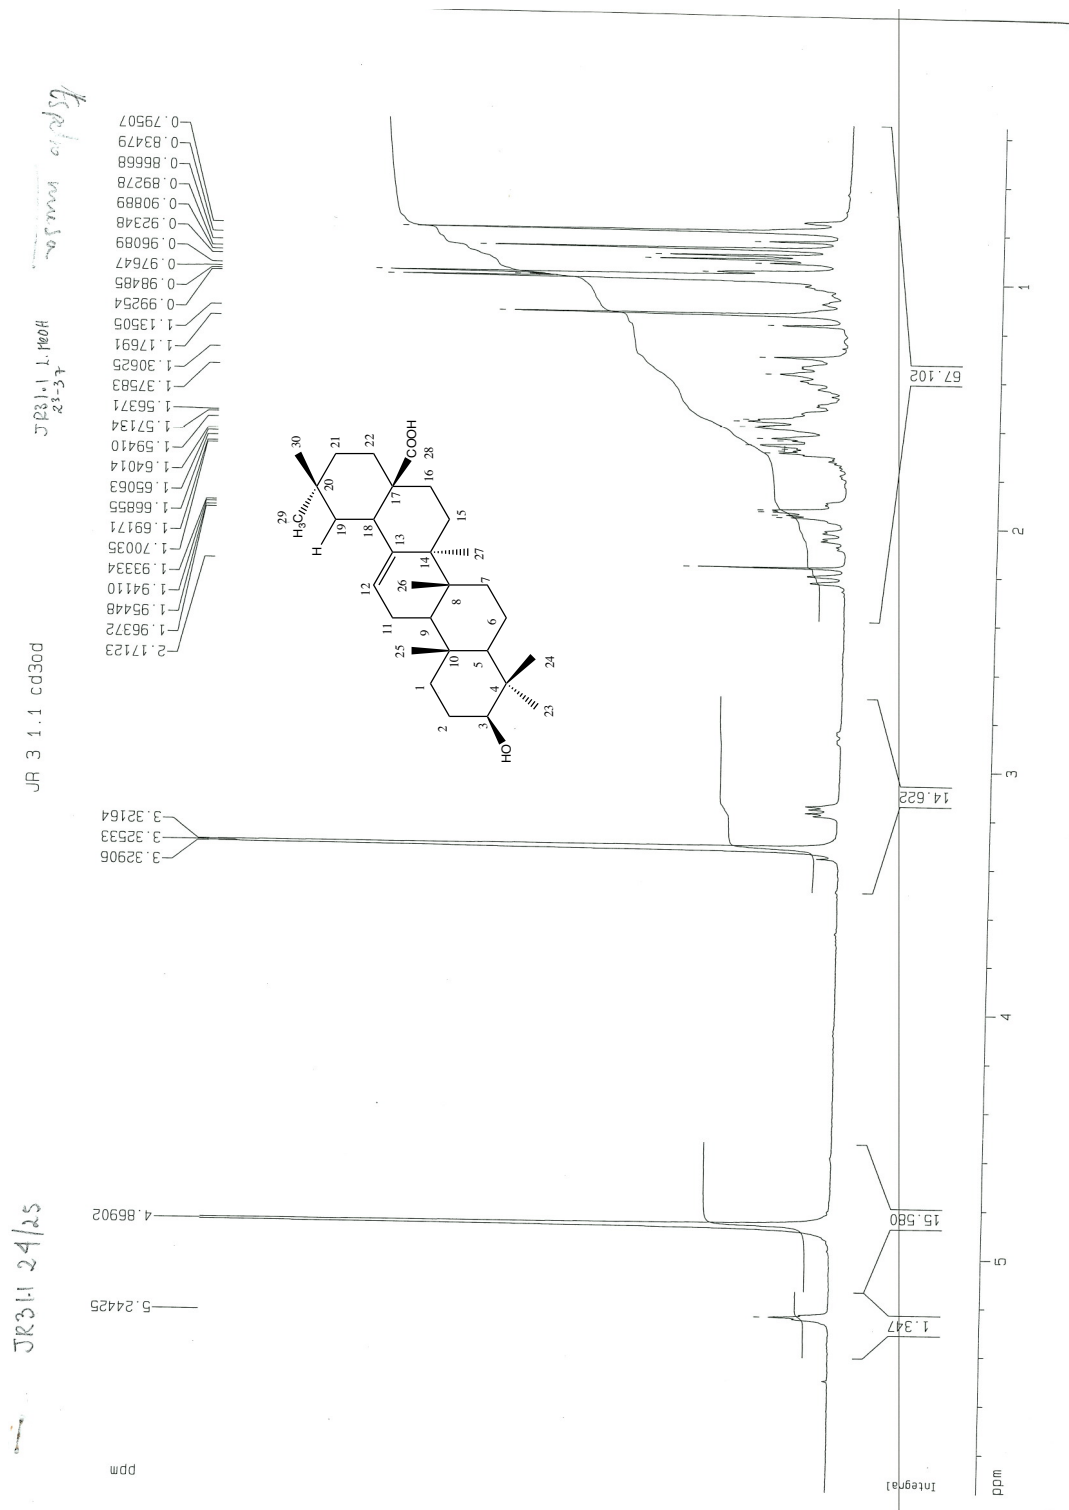

<sup>13</sup>C-NMR of oleanolic acid (CD<sub>3</sub>OD, 75 MHz)

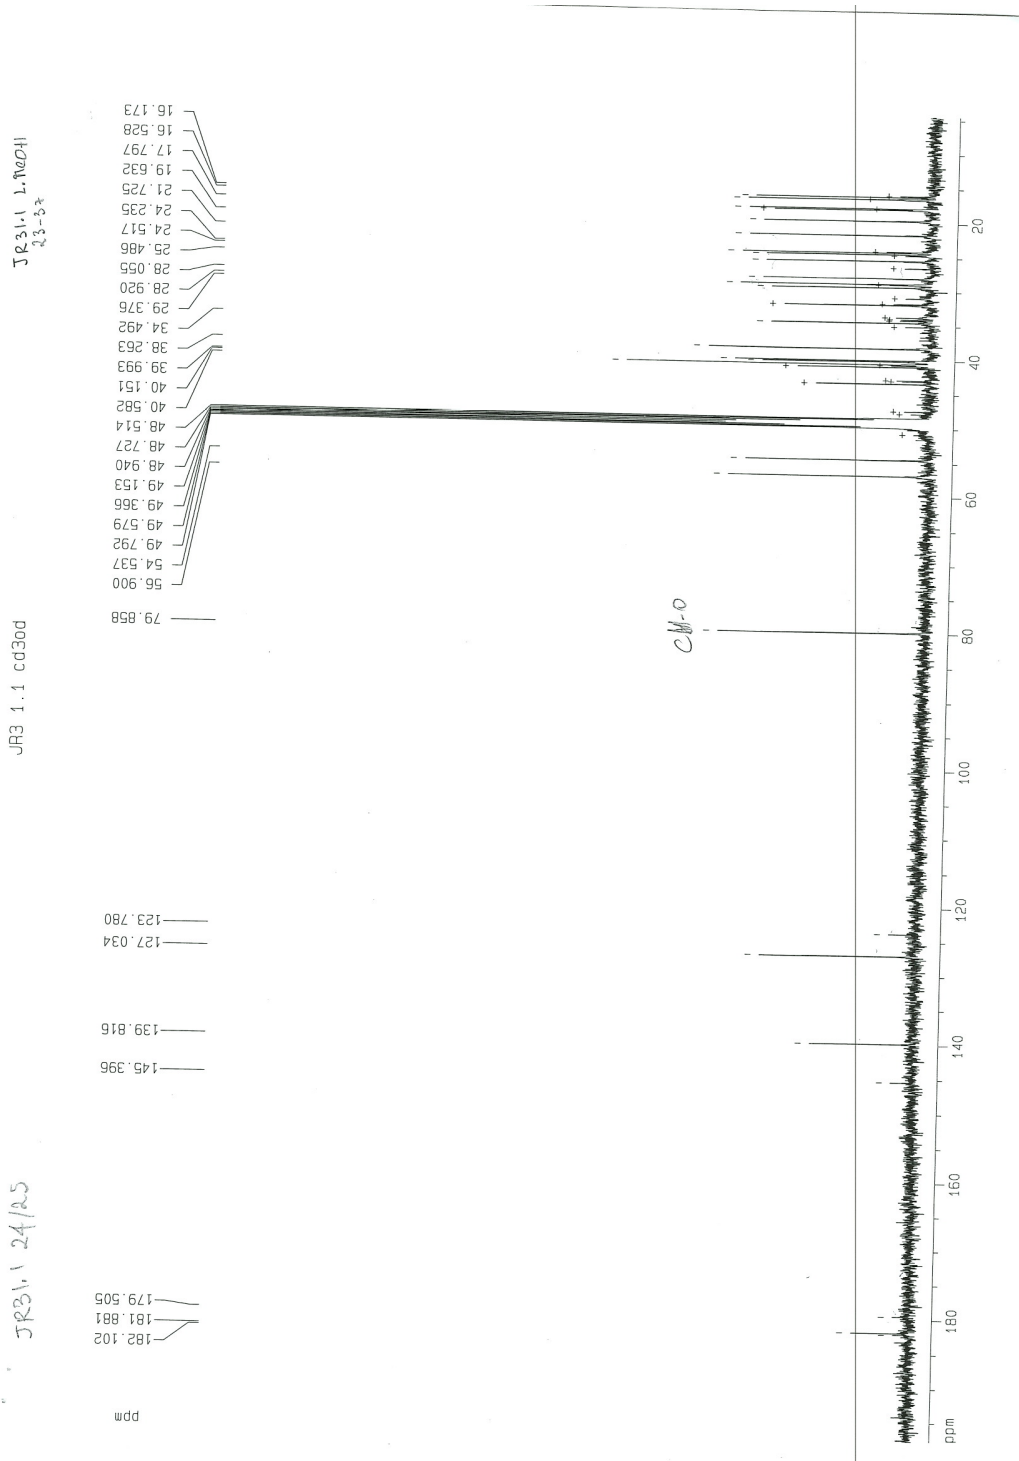

JR31.1 1. hecH  
23-34

JR3 1.1 cd3od dept135

JR31.1 24/25

- 16.166
- 16.517
- 17.957
- 19.625
- 21.718
- 24.228
- 24.505
- 25.475
- 28.047
- 28.910
- 29.369
- 31.931
- 34.482
- 38.266
- 40.141
- 40.571
- 42.897
- 48.998
- 49.153
- 49.213
- 49.428
- 49.641
- 54.527
- 55.889

79.850

127.025

ppm

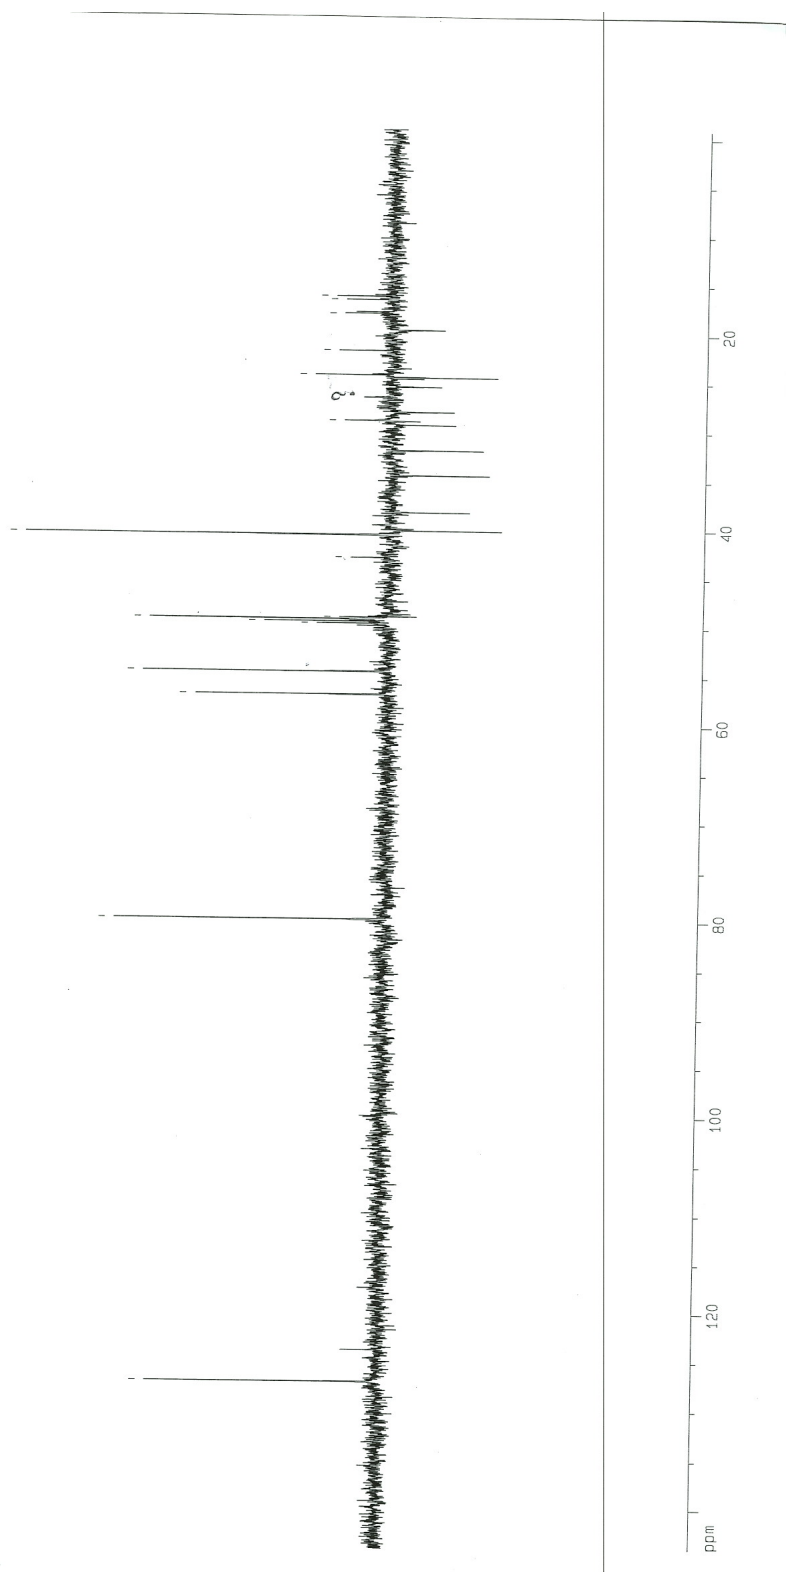

DEPT experiment (300 MHz) of oleanolic acid in CD<sub>3</sub>OD.

JR31.1 70/33

JR 31.1 78-33 cd13 aprile 8

416

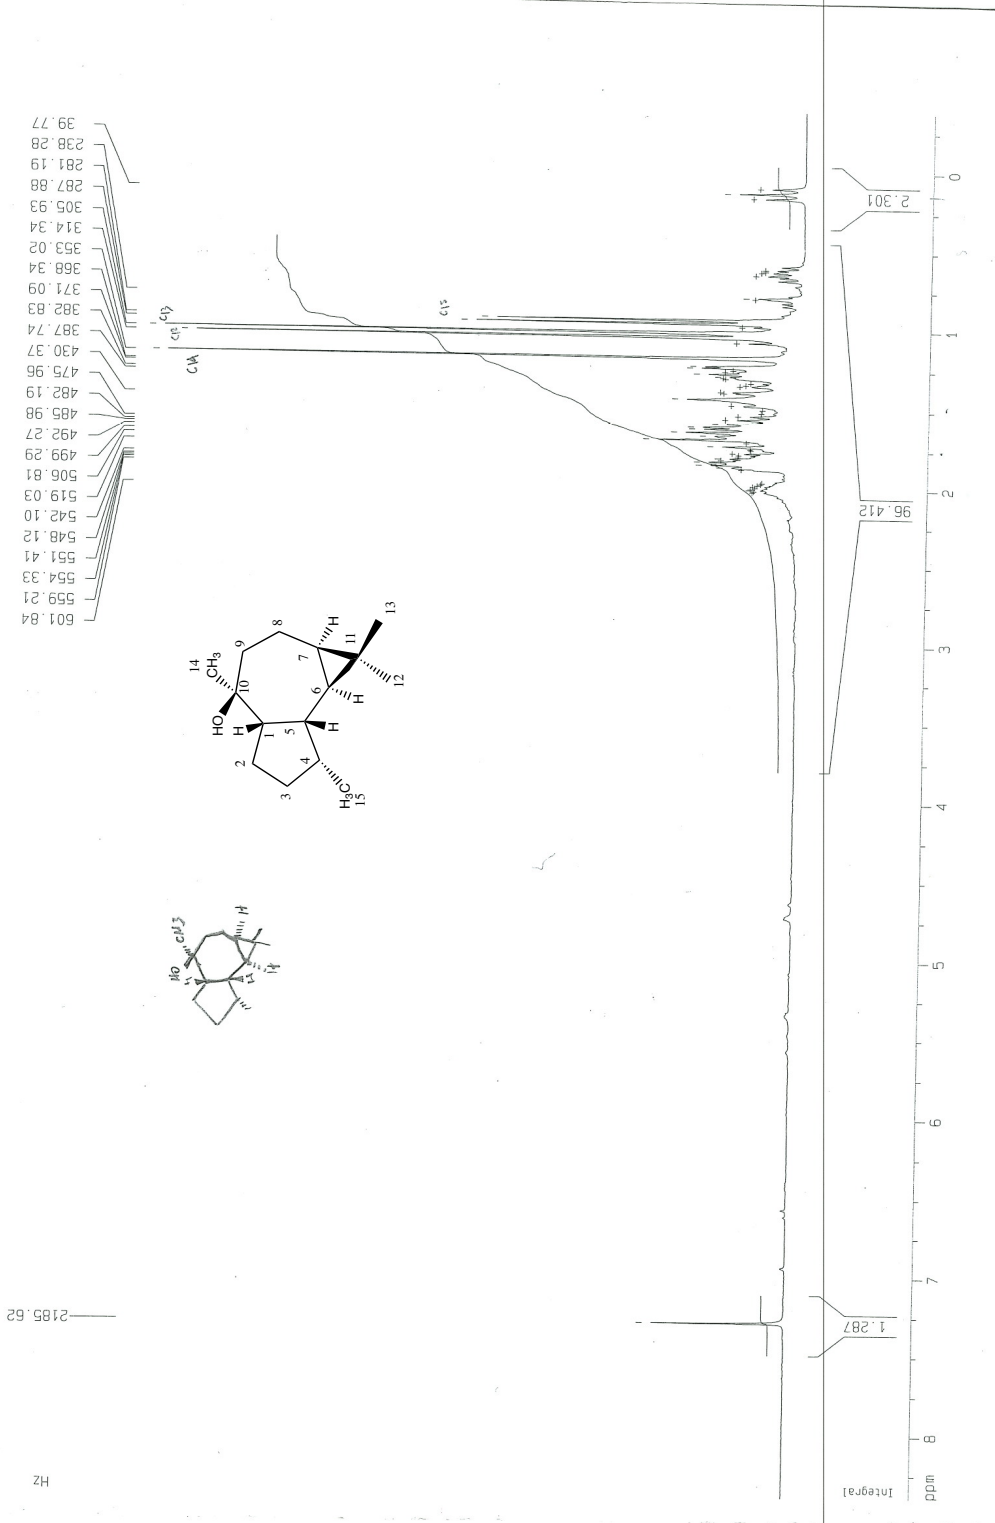

<sup>1</sup>H-NMR of viridiflorol (CDCl<sub>3</sub>, 300 MHz)

<sup>13</sup>C-NMR of viridiflorol (CDCl<sub>3</sub>, 75 MHz)

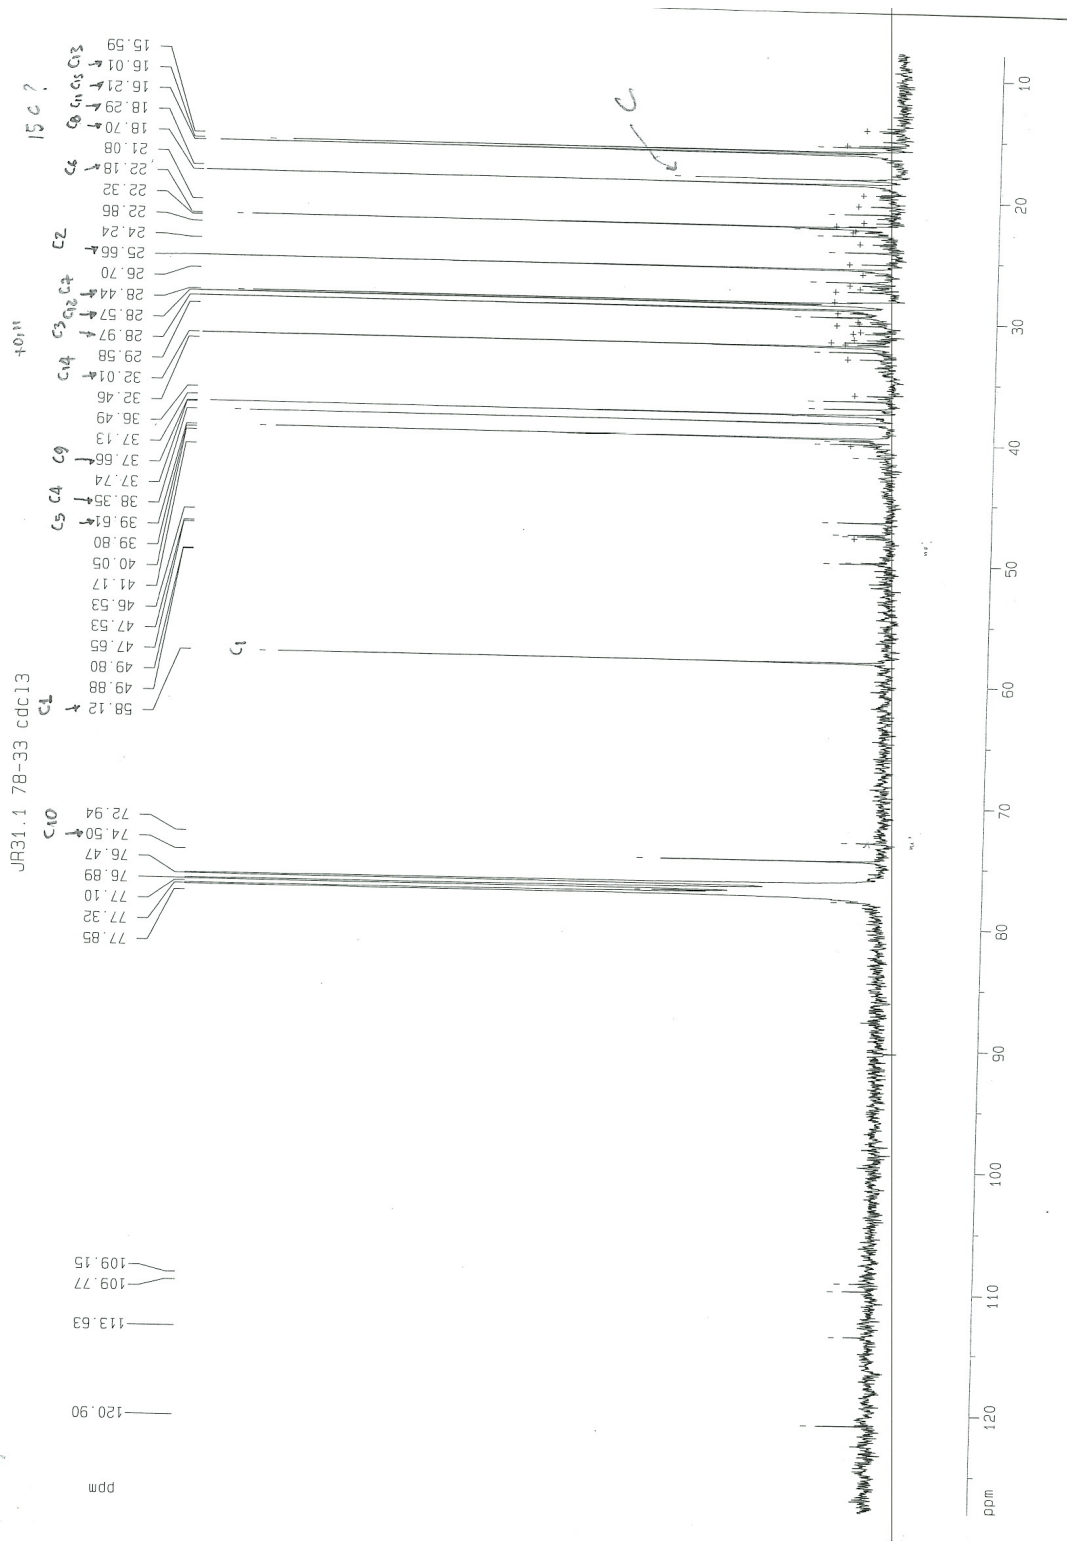

JR 31.1 78-33 cdcl3

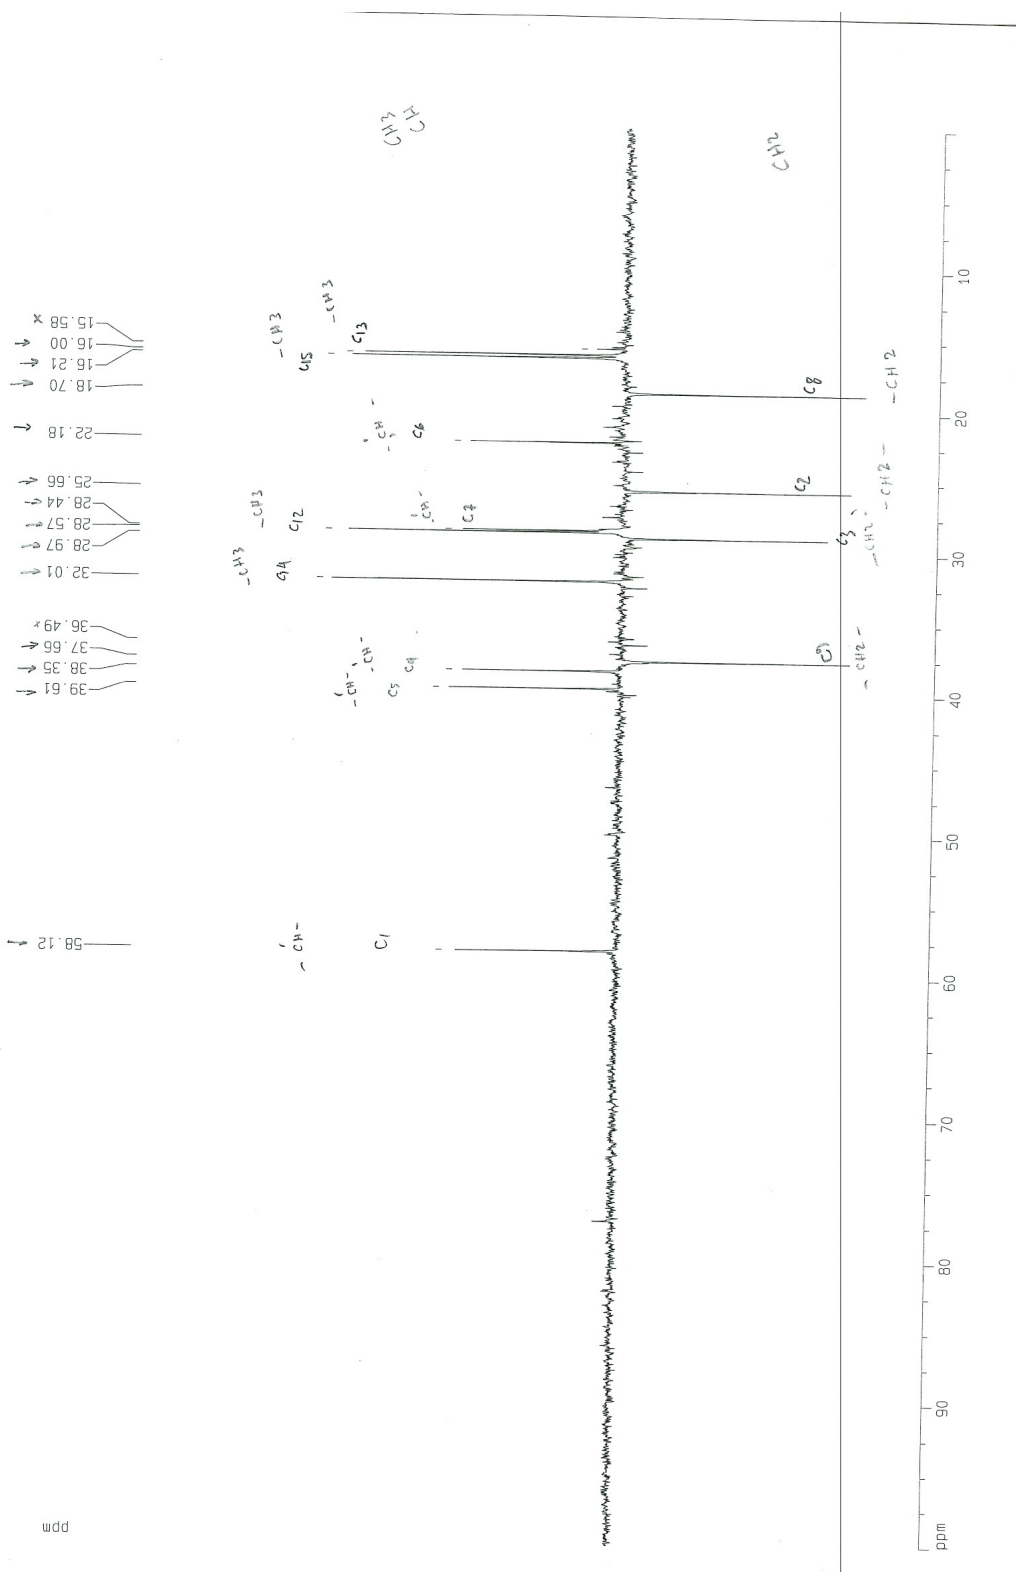

DEPT experiment (300 MHz) of viridiflorol in  $CDCl_3$



STANDARD 1H OBSERVE - profile

Sample Name:  
IR659.L.m.F.JR3-13LA  
Data Collected on:  
wormhole-vnmrs600  
Archive directory:  
/home/vnmr1/vnmrsys/data  
Sample directory:  
IR659.L.m.F.JR3-13LA\_20150130\_01  
FidFile: PROTON\_03

Pulse Sequence: PROTON (s2pul)  
Solvent: cdcl3  
Data collected on: Jan 30 2015

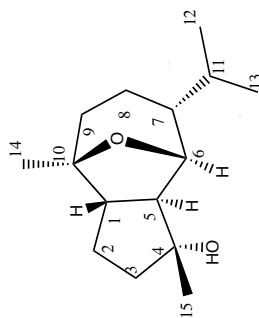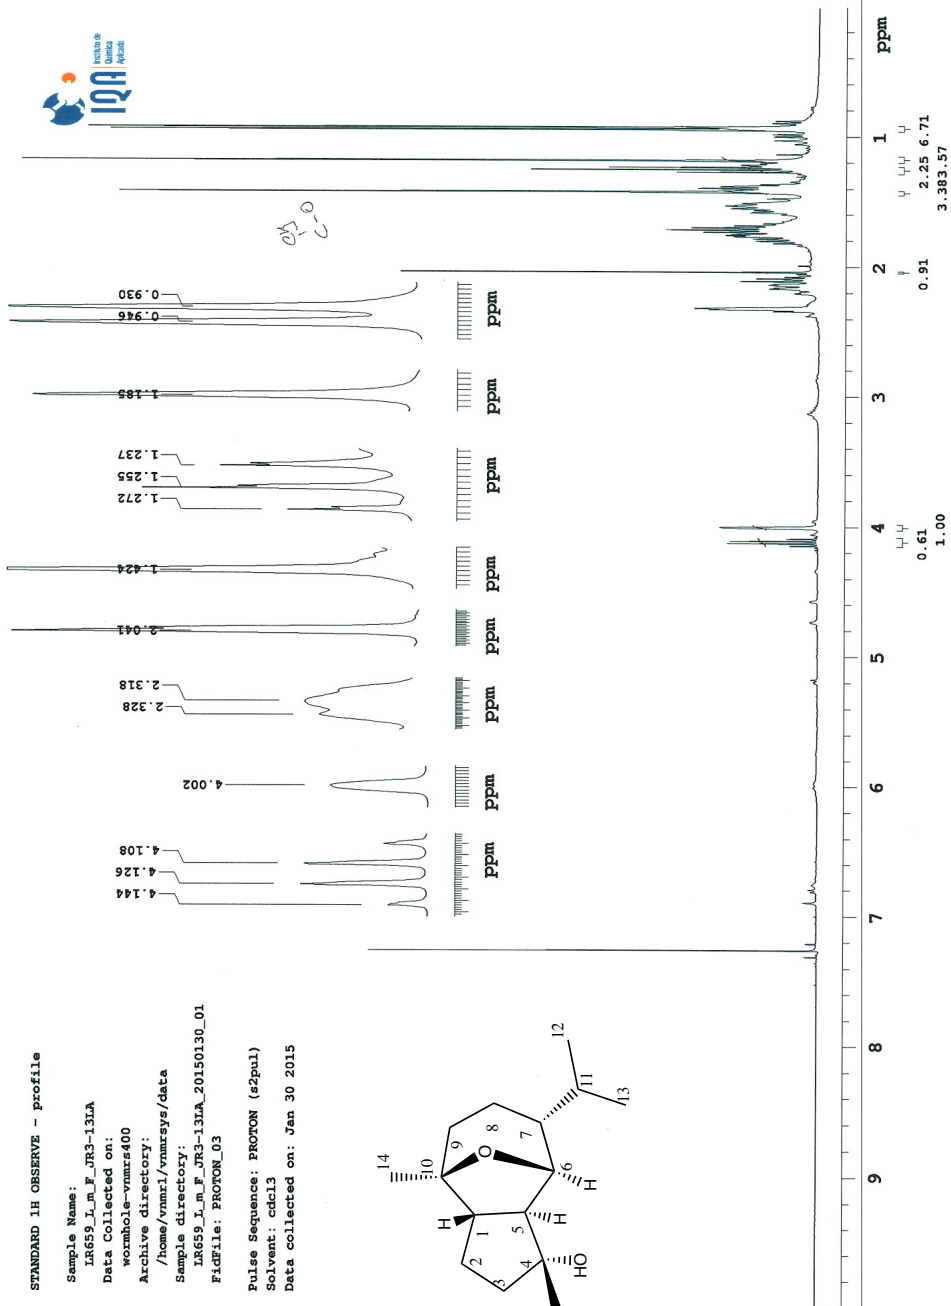

<sup>1</sup>H-NMR of chrysothol (CDCl<sub>3</sub> 400 MHz)

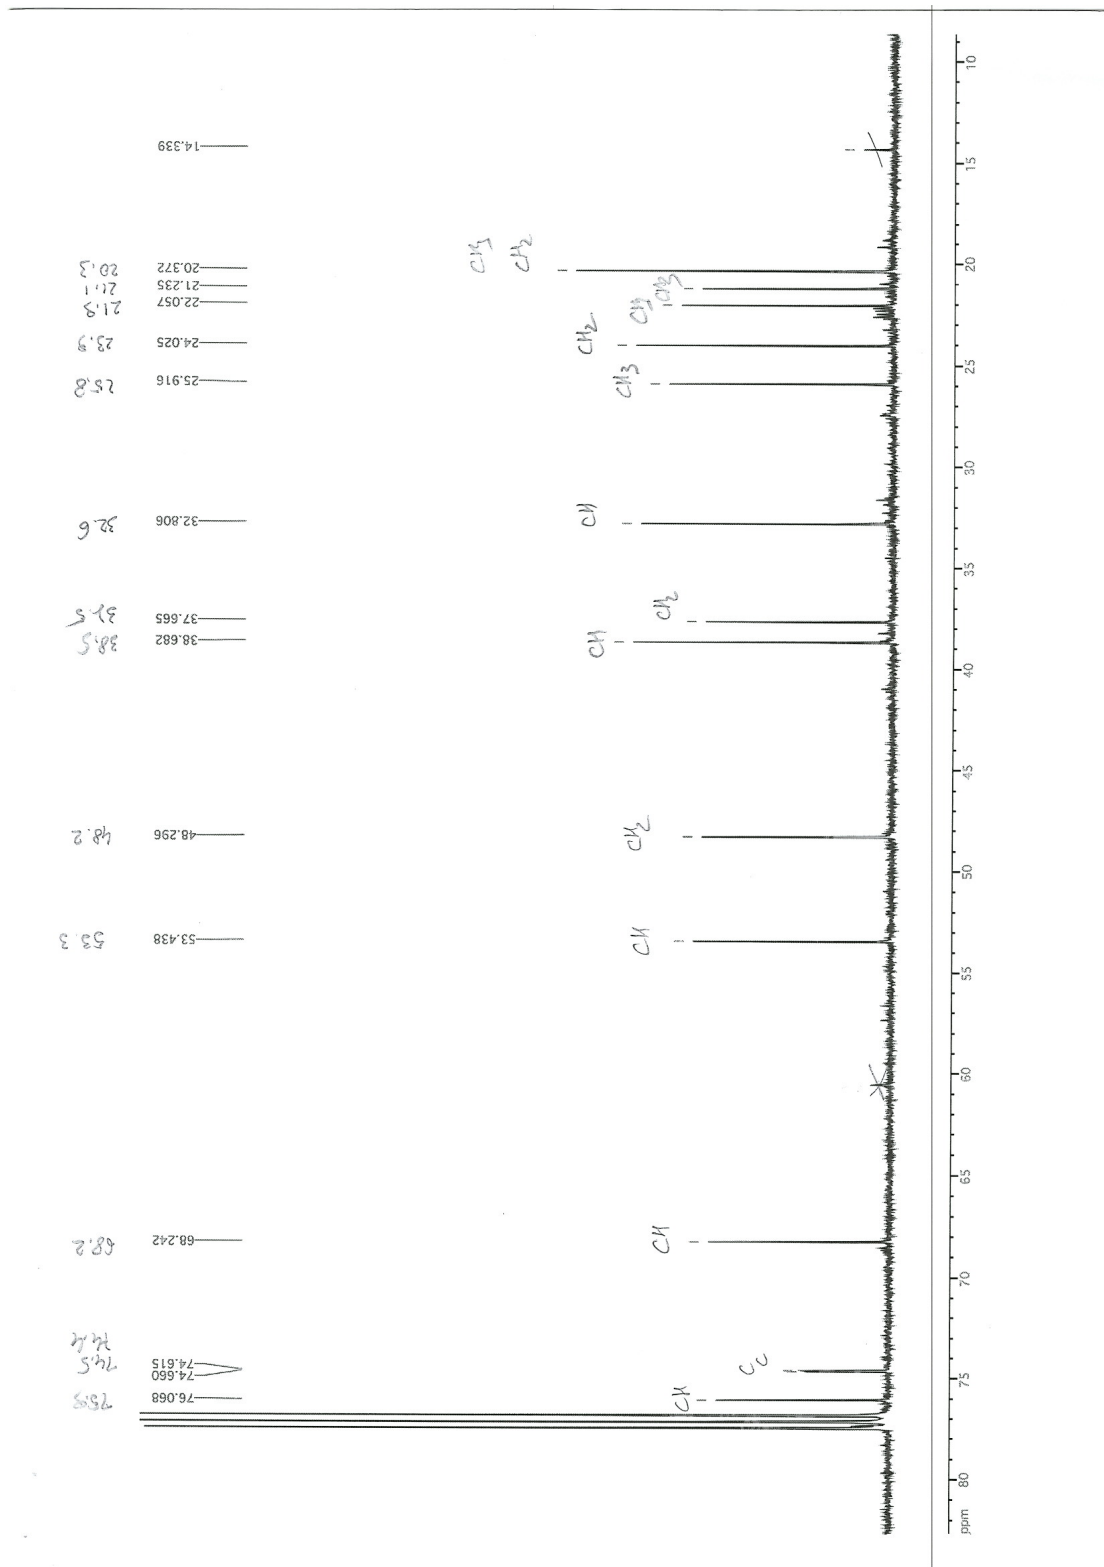

$^{13}\text{C-NMR}$  of chrysothol ( $\text{CDCl}_3$  100 MHz)

STANDARD 1H OBSERVE - profile

Sample Name:  
LR480\_JR31\_13-17  
Data Collected on:  
wormhole-vmrz400  
Archive directory:  
/home/vmrz1/vmrzsys/data  
Sample directory:  
LR480\_JR31\_13-17\_20140828\_01  
File: DEPT\_01

Pulse Sequence: DEPT  
Solvent: cdcl3  
Data collected on: Aug 28 2014

Temp: 25.0 C / 298.1 K  
Operator: vmr1  
Relax. delay 1.000 sec  
Pulse 90.0 degrees  
Acq. time 1.285 sec  
Width 25510.2 Hz  
1024 repetitions  
OBSERVE C13, 100.5376906 MHz  
DECOUPLE H1, 399.8334195 MHz  
Power 38 dB  
on during acquisition  
off during delay  
WALTZ-16 modulated  
DATA PROCESSING  
Line broadening 0.5 Hz  
Ft size 65536  
Total time 7 hr, 30 min

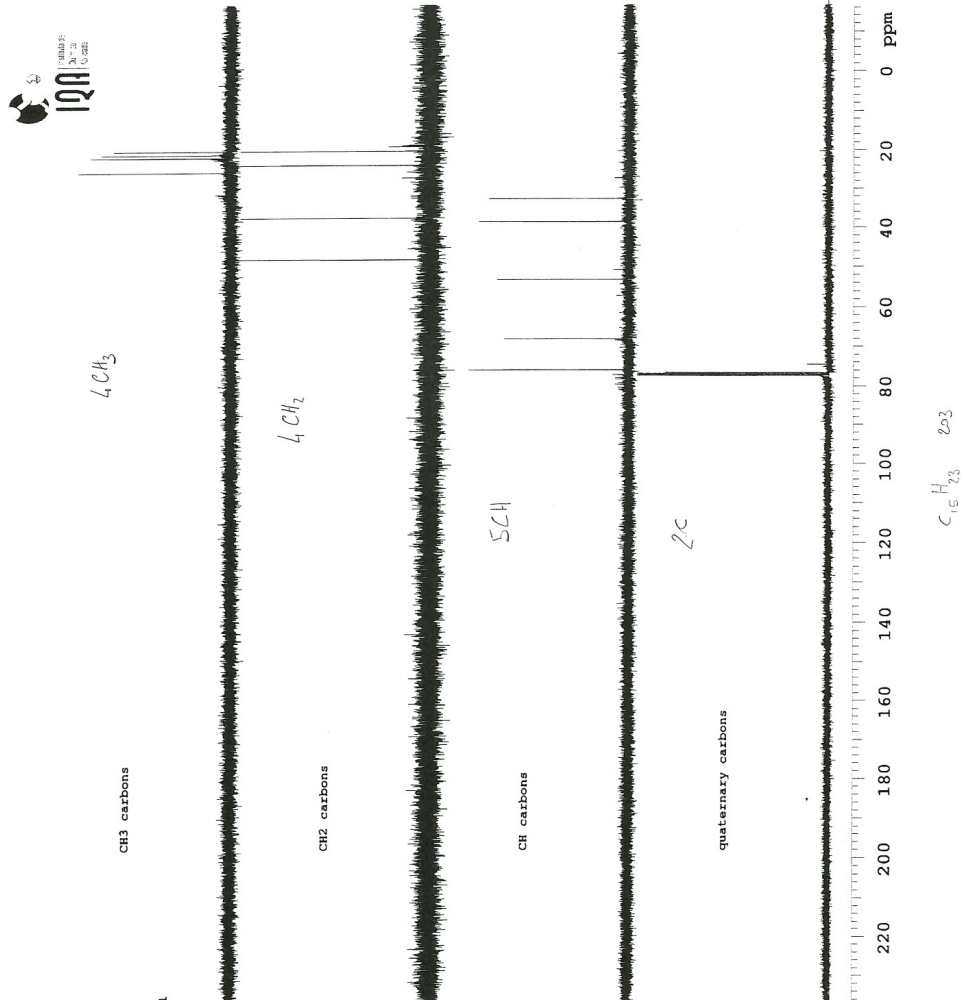

$C_{15}H_{25}$   
 $205 + 15 = 220$   
 $220 + 18 = 238$   
 $C_{15}H_{26}O_2$

DEPT experiment (400 MHz) of chrysothol in  $CDCl_3$

<sup>1</sup>H-NMR of 5-hydroxy-4',7-dimethoxy flavone (CDCl<sub>3</sub>, 400 MHz)

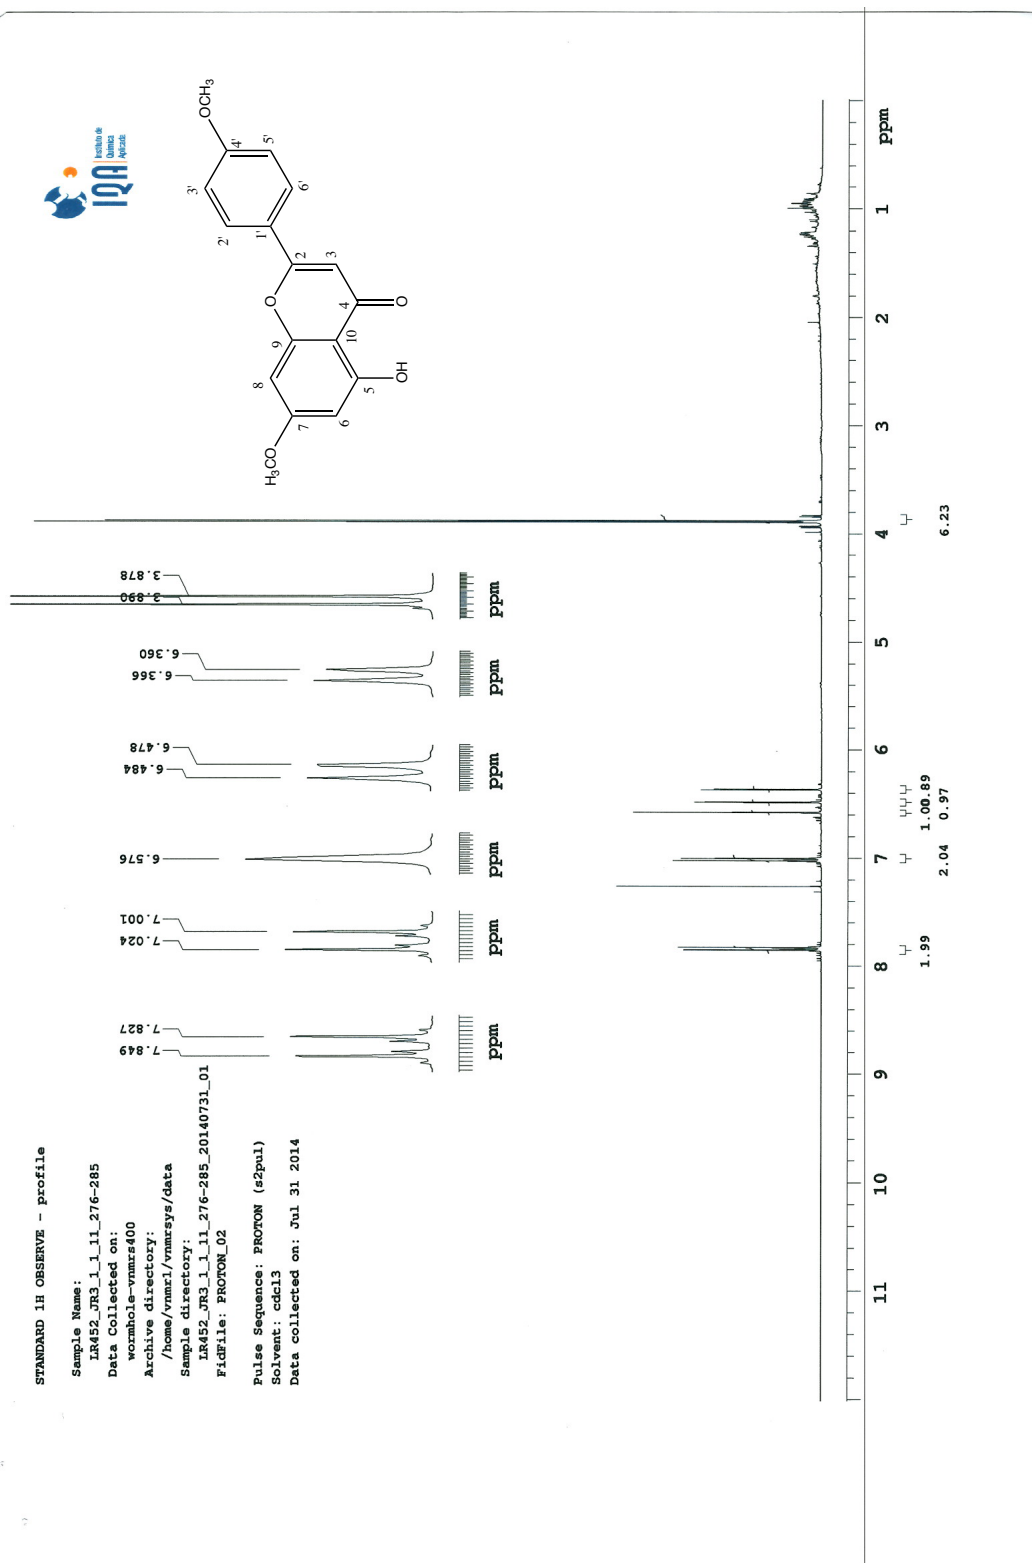

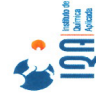

STANDARD 1H OBSERVE - Profile

Sample Name: IR452\_JR3\_1\_1\_11\_276-285  
Data Collected on: wormhole-vnmrs400  
Archive directory: /home/vnmr1/vnmrsys/data  
Sample directory: IR452\_JR3\_1\_1\_11\_276-285\_20140731\_01  
FidFile: CARBON\_01

Pulse Sequence: CARBON (s2pul)  
Solvent: cdcl3  
Data collected on: Jul 31 2014

Temp: 25.0 C / 298.1 K  
Operator: vnmr1

Relax delay 1.000 sec  
Pulse 45.0 degrees  
Acq. time 1.285 sec  
Width 25510.2 Hz

10000 repetitions  
OBSERVE C13, 100.5376751 MHz  
DECOUPLE H1, 399.8334195 MHz  
Power 38 dB  
continuously on

WALTZ-16 modulated  
DATA PROCESSING  
Line broadening 0.5 Hz  
Ff size 65536  
Total time 6 hr, 20 min

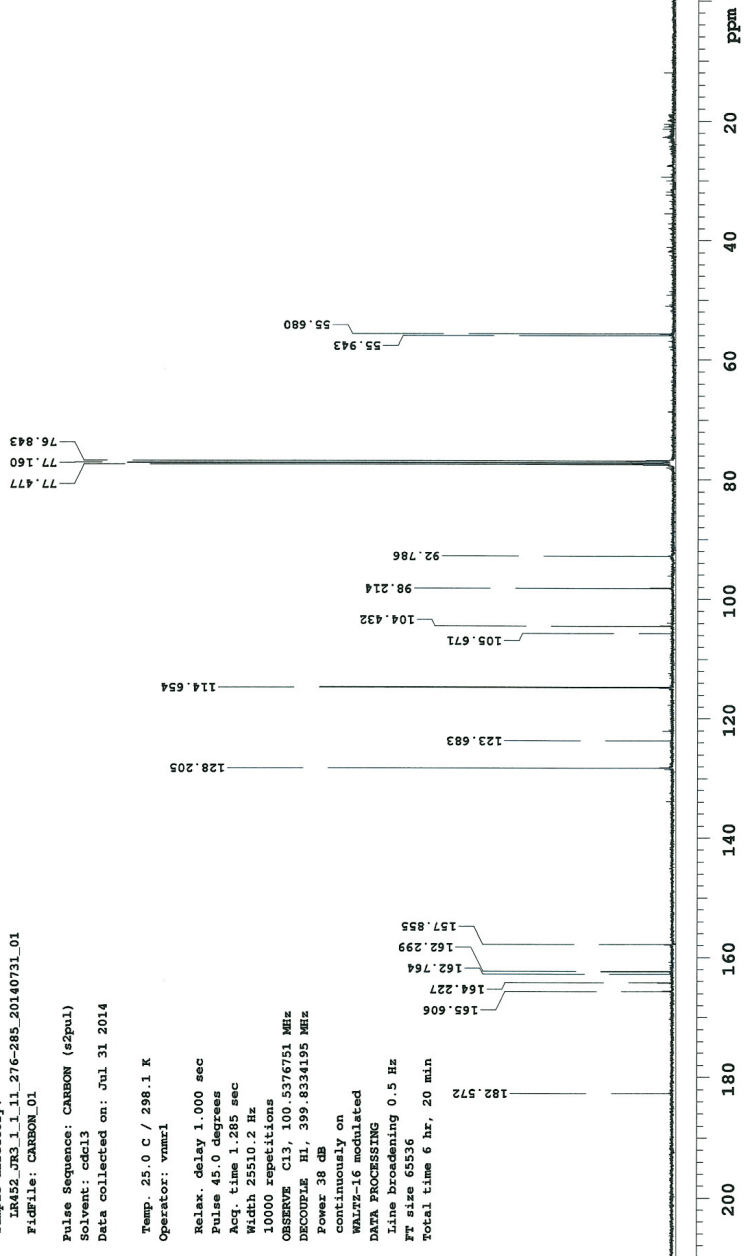

<sup>13</sup>C-NMR of 5-hydroxy-4',7-dimethoxy flavone (CDCl<sub>3</sub>, 100 MHz)

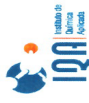

STANDARD 1H OBSERVE - profile

Sample Name:  
IR452\_JR3\_1\_1\_11\_276-285  
Data Collected on:  
wormhole-vnmrs400  
Archive directory:  
/home/vnmr1/vnmrsys/data  
Sample directory:  
IR452\_JR3\_1\_1\_11\_276-285\_20140731\_01  
FidFile: DEPT\_01

CH3 carbons

Pulse Sequence: DEPT  
Solvent: cdcl3  
Data collected on: Aug 1 2014

Temp. 25.0 C / 298.1 K  
Operator: vnmr1

CH2 carbons

Relax. delay 1.000 sec  
Pulse 90.0 degrees  
Acq. time 1.285 sec  
Width 25510.2 Hz  
1024 repetitions  
OBSERVE C13, 100.5376906 MHz  
DECOUPLE H1, 399.8334195 MHz  
Power 38 dB  
on during acquisition  
off during delay  
WALTZ-16 modulated  
DATA PROCESSING  
Line broadening 0.5 Hz  
Ff size 65536  
Total time 7 hr, 30 min

CH carbons

quaternary carbons

220 200 180 160 140 120 100 80 60 40 20 0 ppm

DEPT experiment (400 MHz) of 5-hydroxy-4',7-dimethoxy flavone in CDCl<sub>3</sub>
